# Supplementary material for: Adjusting for overdispersion in piecewise exponential regression models to estimate excess mortality rate in population-based research
Source: PubMed Central journal article supplement (PMC5045632; doi:10.1186/s12874-016-0234-z), 2016-10-01
Supplement: 12874_2016_234_MOESM1_ESM.pdf [file 12874_2016_234_MOESM1_ESM.pdf]

## Additional file One

### Robust standard error estimation for generalized linear models

Let  $\theta \in R^p$  be a  $p \times 1$  parameter vector and  $f_i$  be a positive density function  $y_i \sim f_i(y_i|\theta)$ . The data  $(y_i)$  are modeled as observed values of  $Y_i$  for  $i = 1, \dots, n$  and the likelihood function is given by

$$L(\theta) = \prod_{i=1}^n f_i(y_i|\theta),$$

and the log-likelihood function by

$$LL(\theta) = \sum_{i=1}^n \ln f_i(y_i|\theta).$$

First derivative (gradient) of the log-likelihood function

$$L'(\theta) = \sum_{i=1}^n g_i(y_i|\theta) = \sum_{i=1}^n \frac{\partial \ln f_i(y_i|\theta)}{\partial \theta}.$$

Second derivative (hessian) of the log-likelihood function

$$L''(\theta) = \sum_{i=1}^n h_i(y_i|\theta) = \sum_{i=1}^n \frac{\partial^2 \ln f_i(y_i|\theta)}{\partial \theta^2}.$$

Assuming that the model is correct, there is a true value  $\theta_0$  for  $\theta$ . Then, we can use the Taylor approximation of second order for the log-likelihood function to estimate  $\theta$ .

$$L(\theta) = L(\theta_0) + L'(\theta_0)(\theta - \theta_0) + \frac{1}{2}(\theta - \theta_0)^T L''(\theta_0)(\theta - \theta_0) + \dots$$

Therefore to derive the variance covariance matrix from the maximum likelihood estimation we can differentiate this expression to get

$$L'(\theta_0) + (\theta - \theta_0)^T L''(\theta_0) = 0.$$

$$\text{So, } \hat{\theta} - \theta_0 = [-L''(\theta_0)]^{-1} L'(\theta_0)^T,$$

$$\text{Cov}(\hat{\theta}) = [-L''(\theta_0)]^{-1} [\text{Cov}(L'(\theta_0))][-L''(\theta_0)]^{-1}$$
